# Supplementary material
Source: PubMed Central journal article supplement (PMC4826293)

**A**

- # 22G RNA Reads = # of normalized 22G RNA reads in CSR-1 IP homologous to indicated gene
- Rank = based on # of normalized 22G RNA reads in CSR-1 IP (from 4191 genes with >25 reads)

**Genes that Encode Regulators of the Microtubule Cytoskeleton**

|                                    | Gene          | # 22G RNA Reads | Rank     |
|------------------------------------|---------------|-----------------|----------|
| <b>Tubulin Subunits</b>            | <i>tba-1</i>  | 122             | 1680     |
|                                    | <i>tba-2</i>  | 130             | 1560     |
|                                    | <i>tbb-1</i>  | 463             | 151      |
|                                    | <i>tbb-2</i>  | 175             | 1057     |
| <b>Tubulin Chaperones</b>          | <i>cct-1</i>  | 270             | 496      |
|                                    | <i>cct-3</i>  | 193             | 904      |
|                                    | <i>pfd-1</i>  | 71              | 2674     |
|                                    | <i>pfd-2</i>  | 54              | 3162     |
|                                    | <i>pfd-3</i>  | 110             | 1845     |
|                                    | <i>pfd-4</i>  | 47              | 3377     |
|                                    | <i>pfd-5</i>  | 72              | 2639     |
|                                    | <i>pfd-6</i>  | 63              | 2883     |
|                                    | <i>txdc-9</i> | 81              | 2406     |
|                                    | <i>tbcd-1</i> | 216             | 762      |
| <b>Dynamics Regulators</b>         | <i>klp-7</i>  | <b>1818</b>     | <b>5</b> |
|                                    | <i>tac-1</i>  | 316             | 348      |
|                                    | <i>zyg-9</i>  | 890             | 22       |
|                                    | <i>ebp-2</i>  | 223             | 734      |
| <b>Spindle/Centrosome Assembly</b> | <i>cls-2</i>  | 809             | 33       |
|                                    | <i>rsa-1</i>  | 32              | 3890     |
|                                    | <i>spdl-1</i> | 635             | 59       |
|                                    | <i>tpxl-1</i> | 348             | 288      |
|                                    | <i>air-1</i>  | 108             | 1879     |
|                                    | <i>gip-1</i>  | 249             | 590      |
|                                    | <i>spd-2</i>  | 222             | 738      |
|                                    | <i>spd-5</i>  | 581             | 81       |
| <i>tbg-1</i>                       | 78            | 2492            |          |

**Genes with highest number of CSR-1-bound 22G RNAs**

| Rank | Gene             | # 22G RNA Reads |
|------|------------------|-----------------|
| 1    | <i>Y53F4B.9</i>  | 4096            |
| 2    | <i>E01G4.5</i>   | 3583            |
| 3    | <i>snrp-200</i>  | 1932            |
| 4    | <i>hum-2</i>     | 1827            |
| 5    | <i>klp-7</i>     | <b>1818</b>     |
| 6    | <i>hcp-1</i>     | 1462            |
| 7    | <i>T27F6.6</i>   | 1325            |
| 8    | <i>klp-16</i>    | 1233            |
| 9    | <i>CD4.8</i>     | 1158            |
| 10   | <i>dhc-1</i>     | 1113            |
| 11   | <i>klp-15</i>    | 1101            |
| 12   | <i>top-2</i>     | 1080            |
| 13   | <i>klp-19</i>    | 1073            |
| 14   | <i>wago-4</i>    | 1066            |
| 15   | <i>csr-1</i>     | <b>1057</b>     |
| 16   | <i>egg-6</i>     | 1054            |
| 17   | <i>hrde-1</i>    | 1052            |
| 18   | <i>mep-1</i>     | 1041            |
| 19   | <i>T12E12.3</i>  | 969             |
| 20   | <i>Y111B2A.3</i> | 966             |
| 21   | <i>set-9</i>     | 904             |
| 22   | <i>zyg-9</i>     | 890             |
| 23   | <i>bub-1</i>     | 884             |
| 24   | <i>gpr-1</i>     | 872             |
| 25   | <i>frl-1</i>     | 871             |

\*Data from Claycomb et al. (2009)

**C**

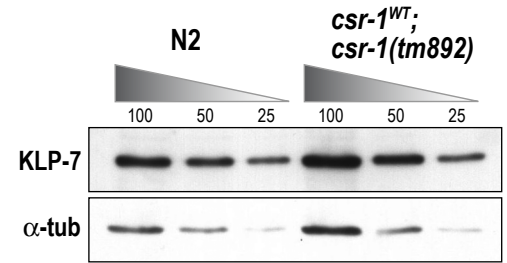

**B**

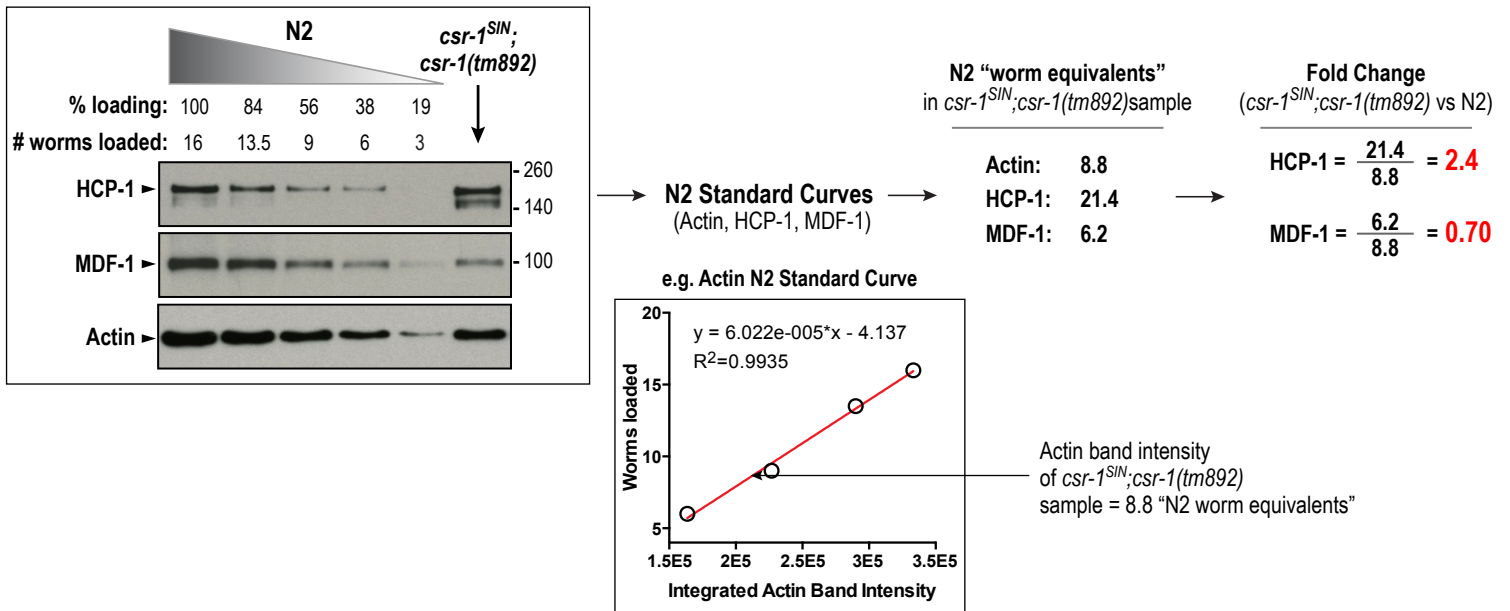

Supplement: NIHMS763560-supplement-4.pdf [file NIHMS763560-supplement-4.pdf]
