# Supplementary material
Source: PubMed Central journal article supplement (PMC4826293)

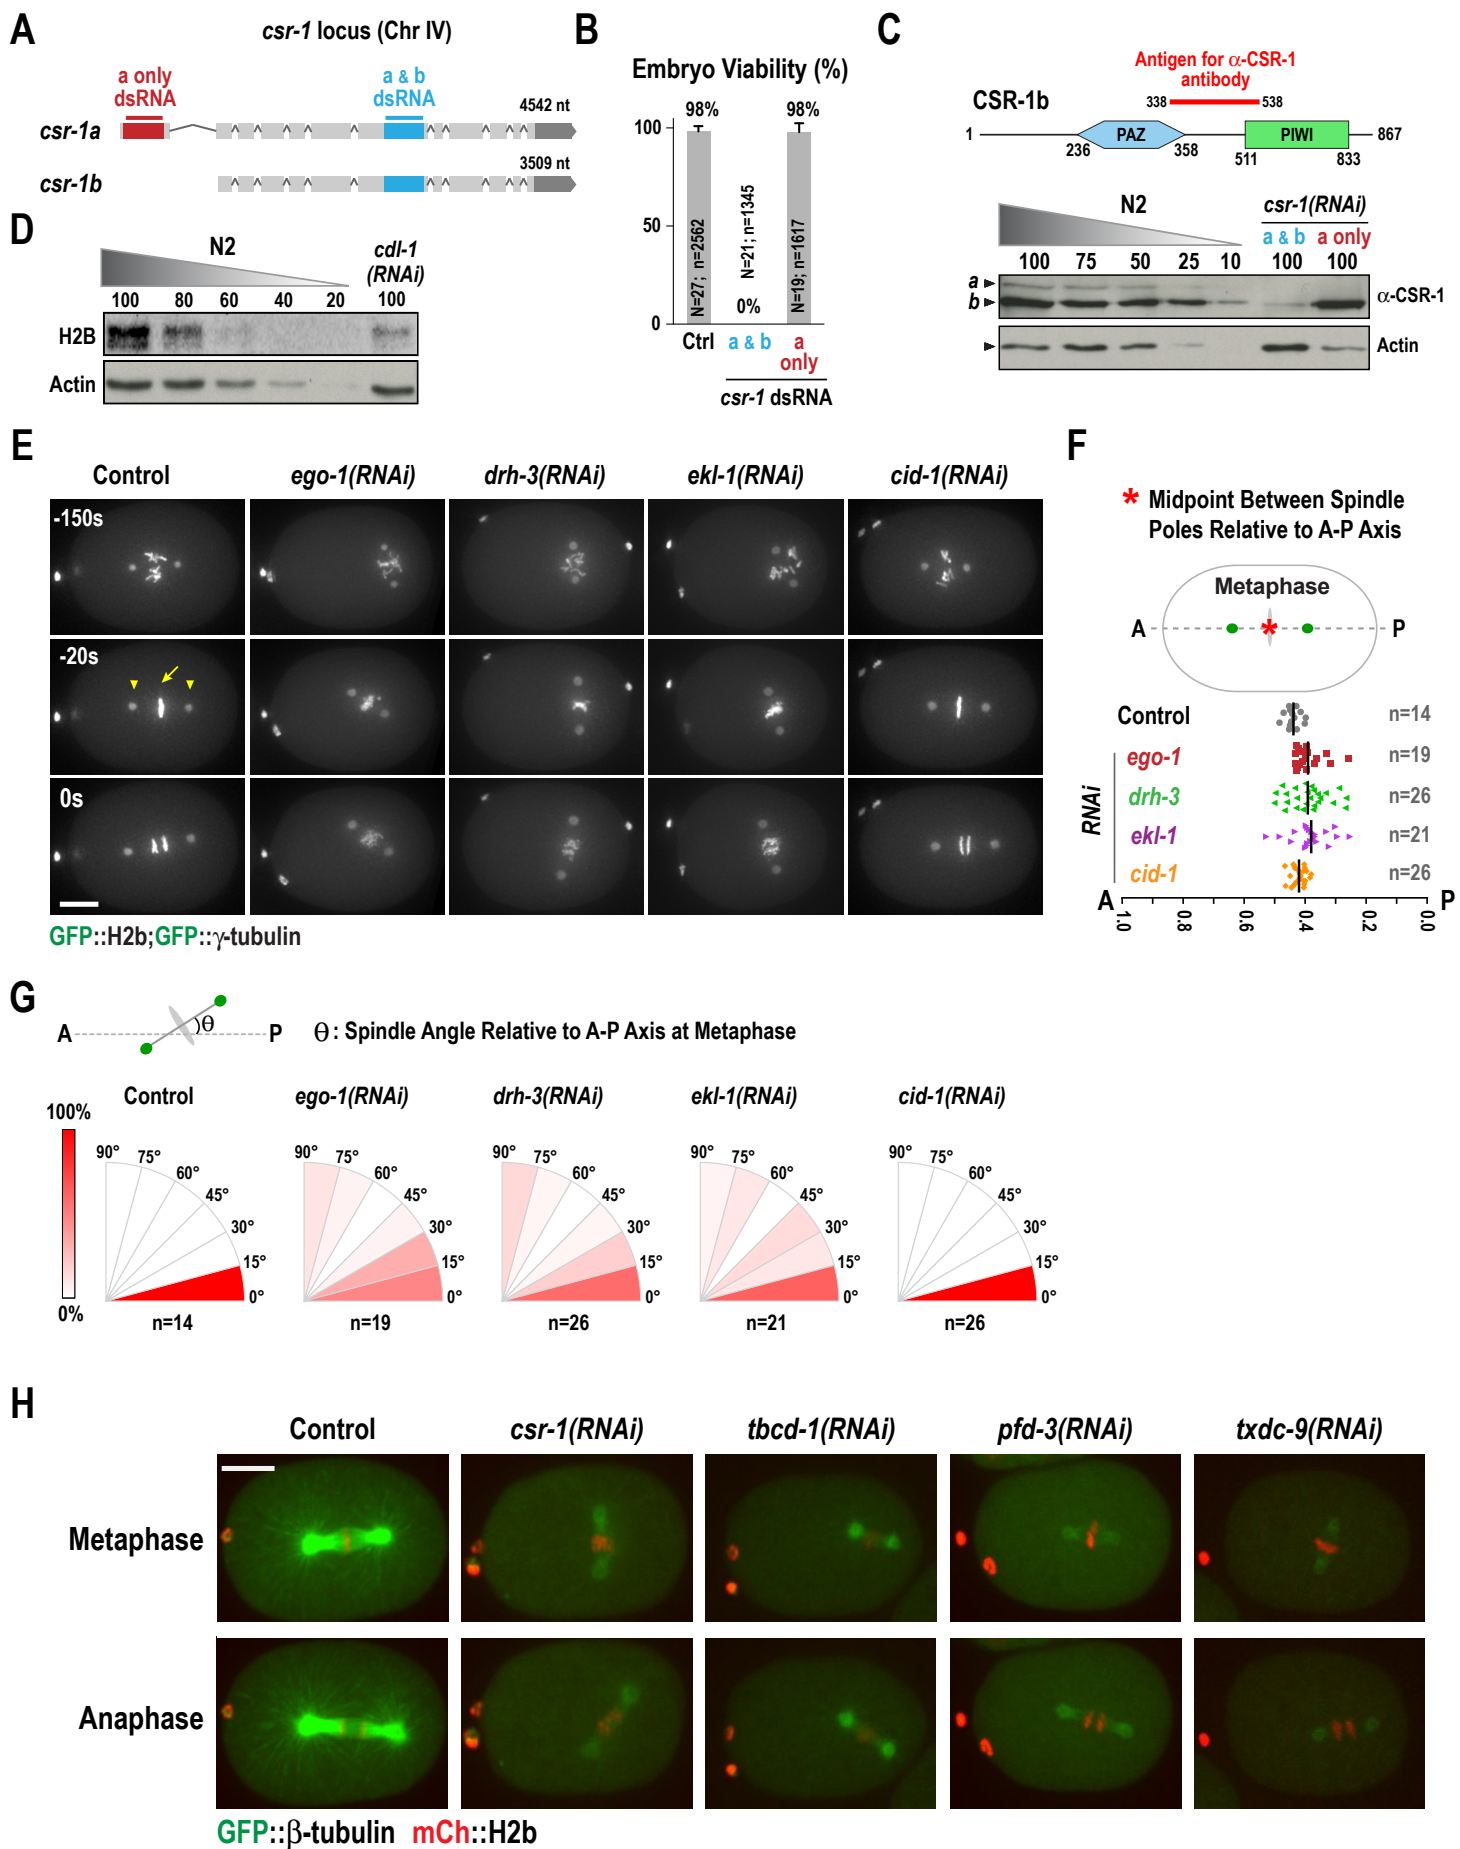

Supplement: NIHMS763560-supplement-1.pdf [file NIHMS763560-supplement-1.pdf]

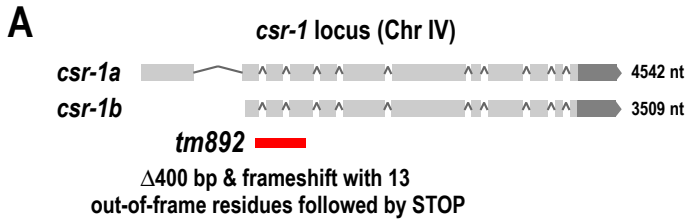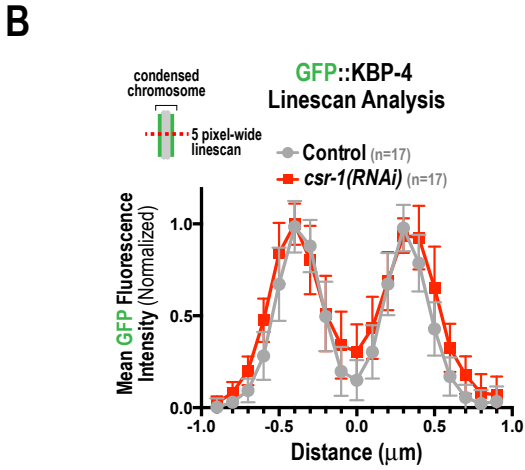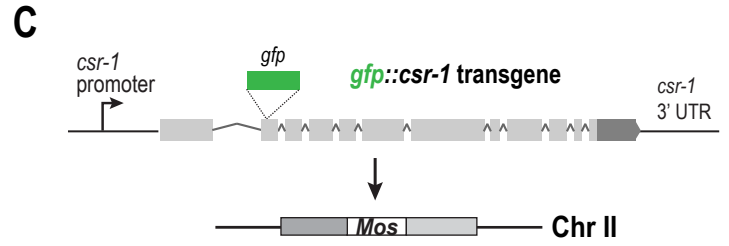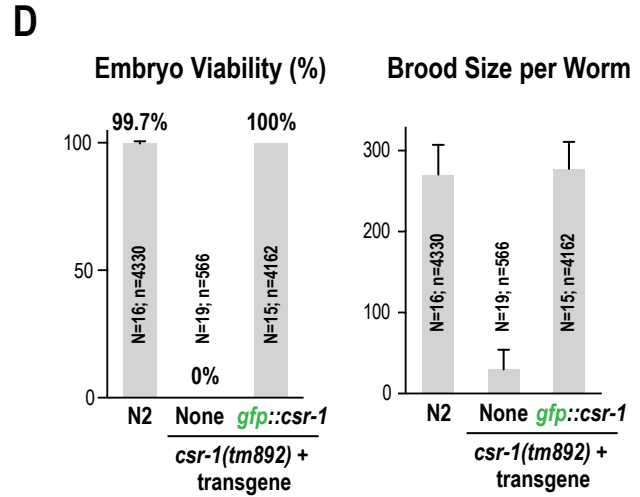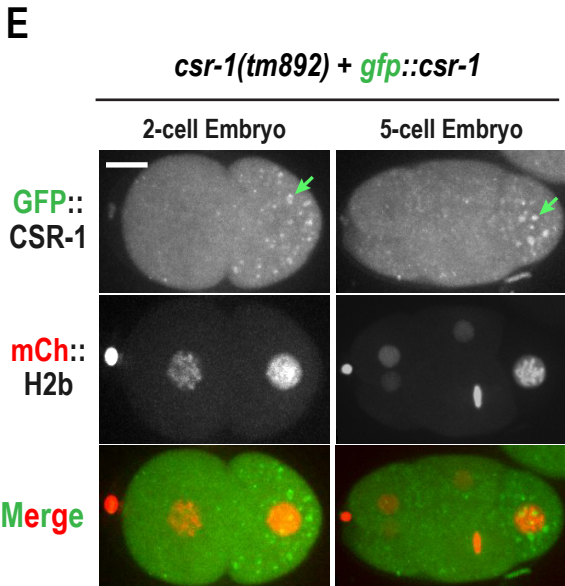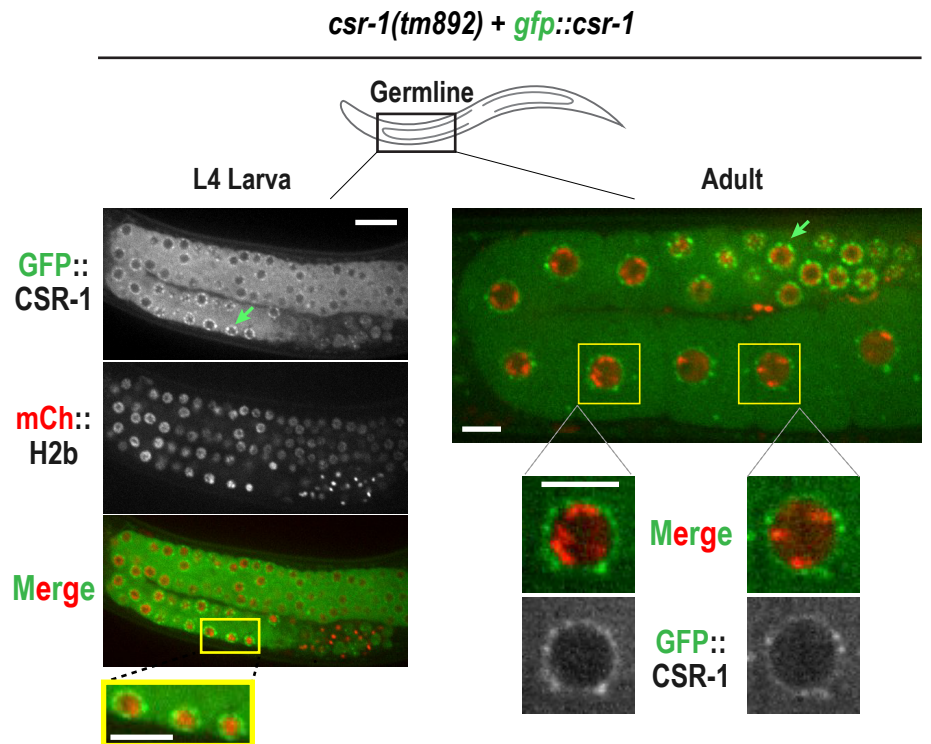

Supplement: NIHMS763560-supplement-2.pdf [file NIHMS763560-supplement-2.pdf]

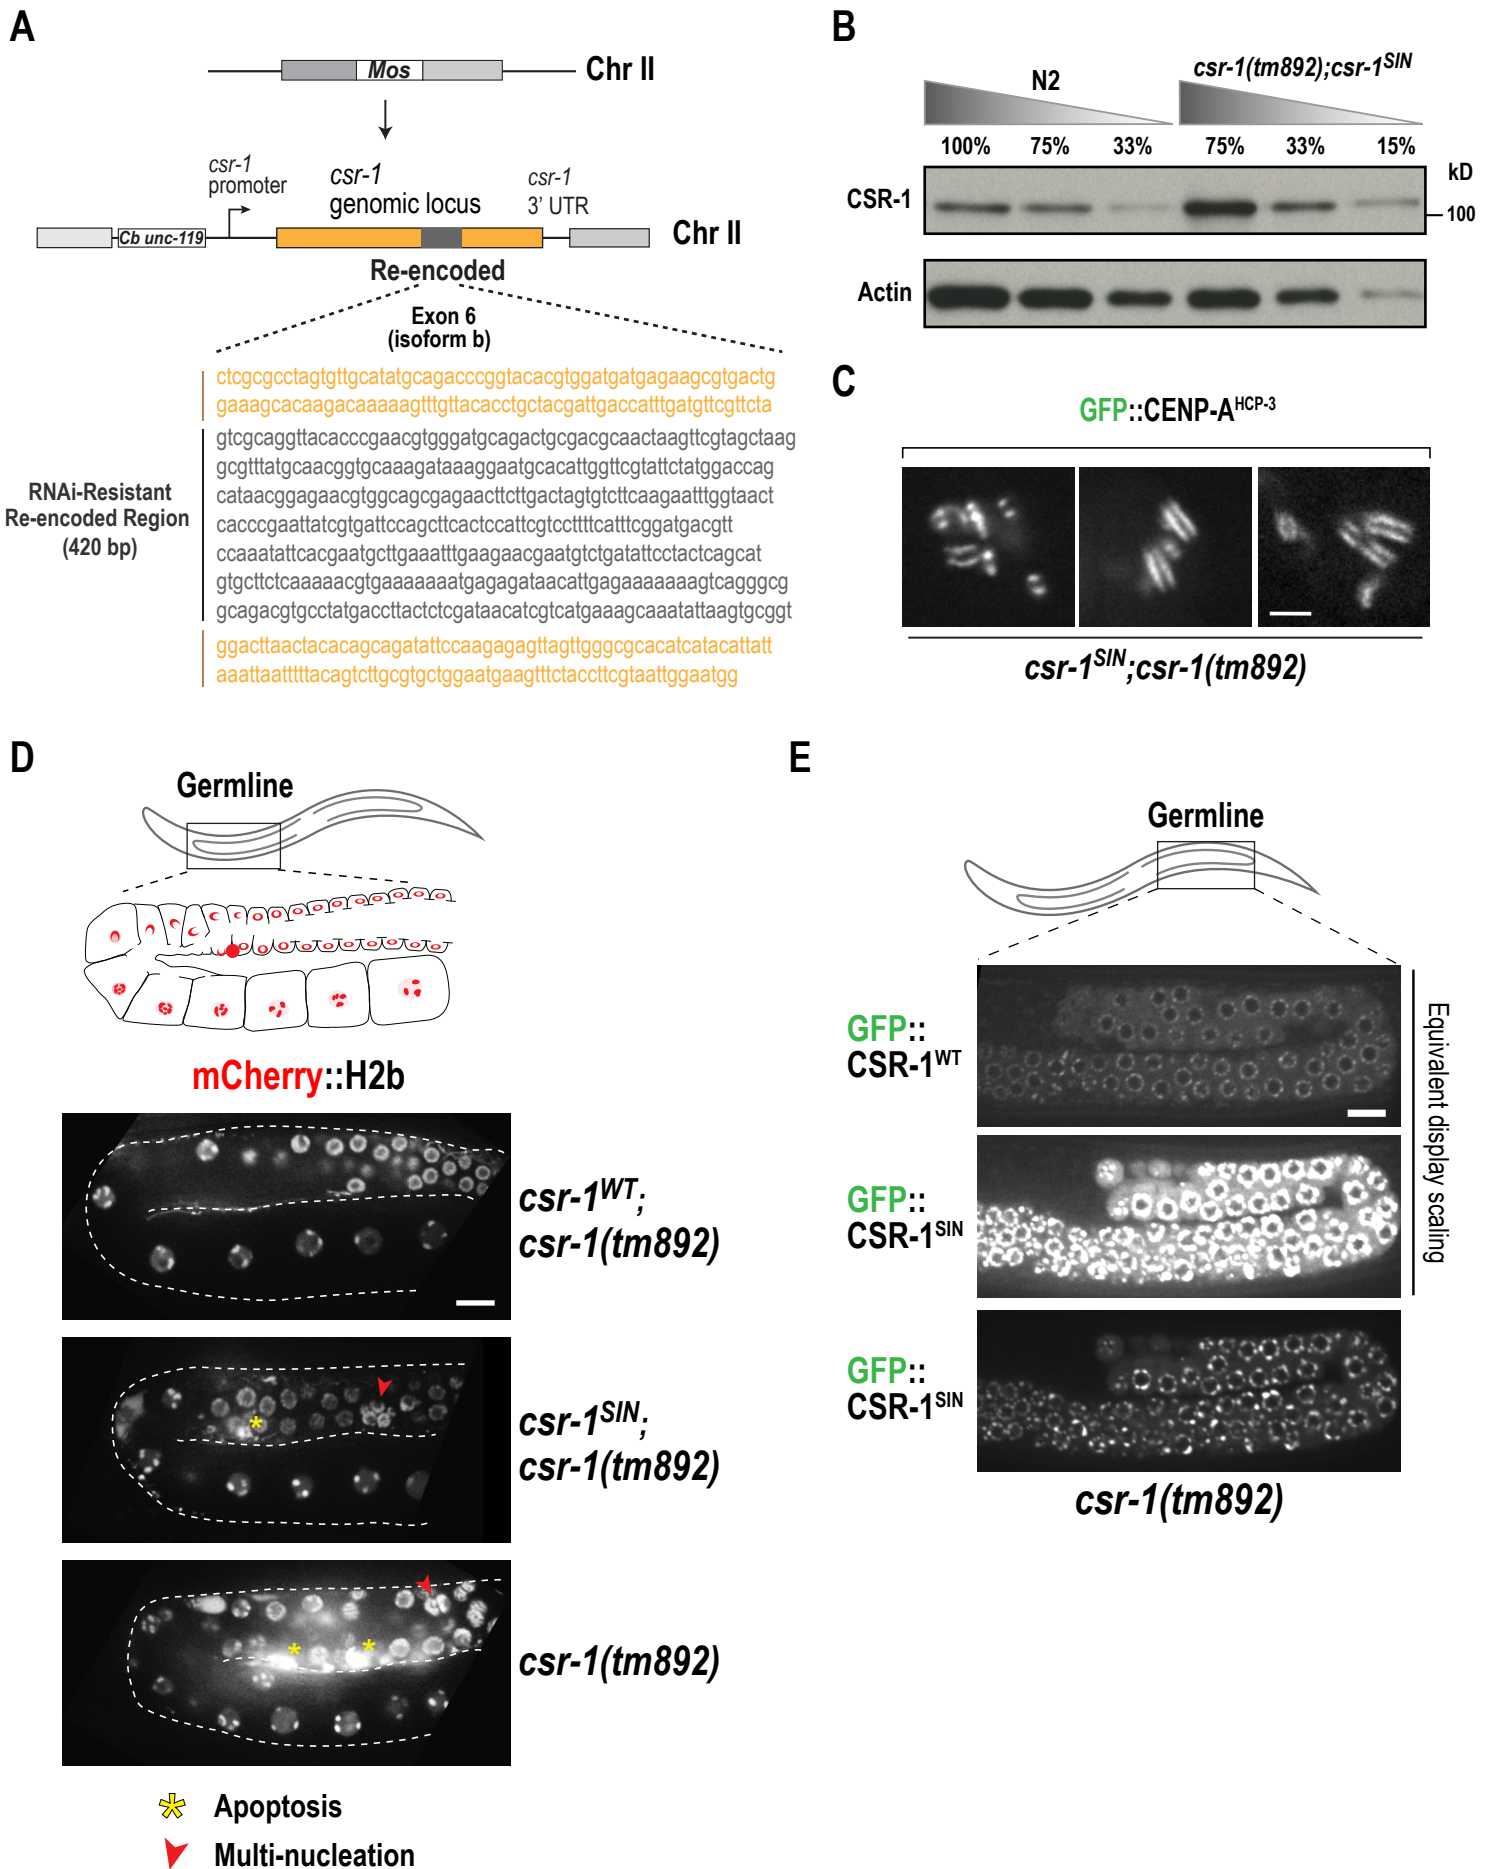

Supplement: NIHMS763560-supplement-3.pdf [file NIHMS763560-supplement-3.pdf]
